# Supplementary material for: Myh6-driven Cre recombinase activates the DNA damage response and the cell cycle in the myocardium in the absence of loxP sites
Source: PubMed Central journal article supplement (PMC7758623; doi:10.1242/dmm.046375), 2020-12-18
Supplement: dmm-13-046375-s1.pdf [file dmm-13-046375-s1.pdf]

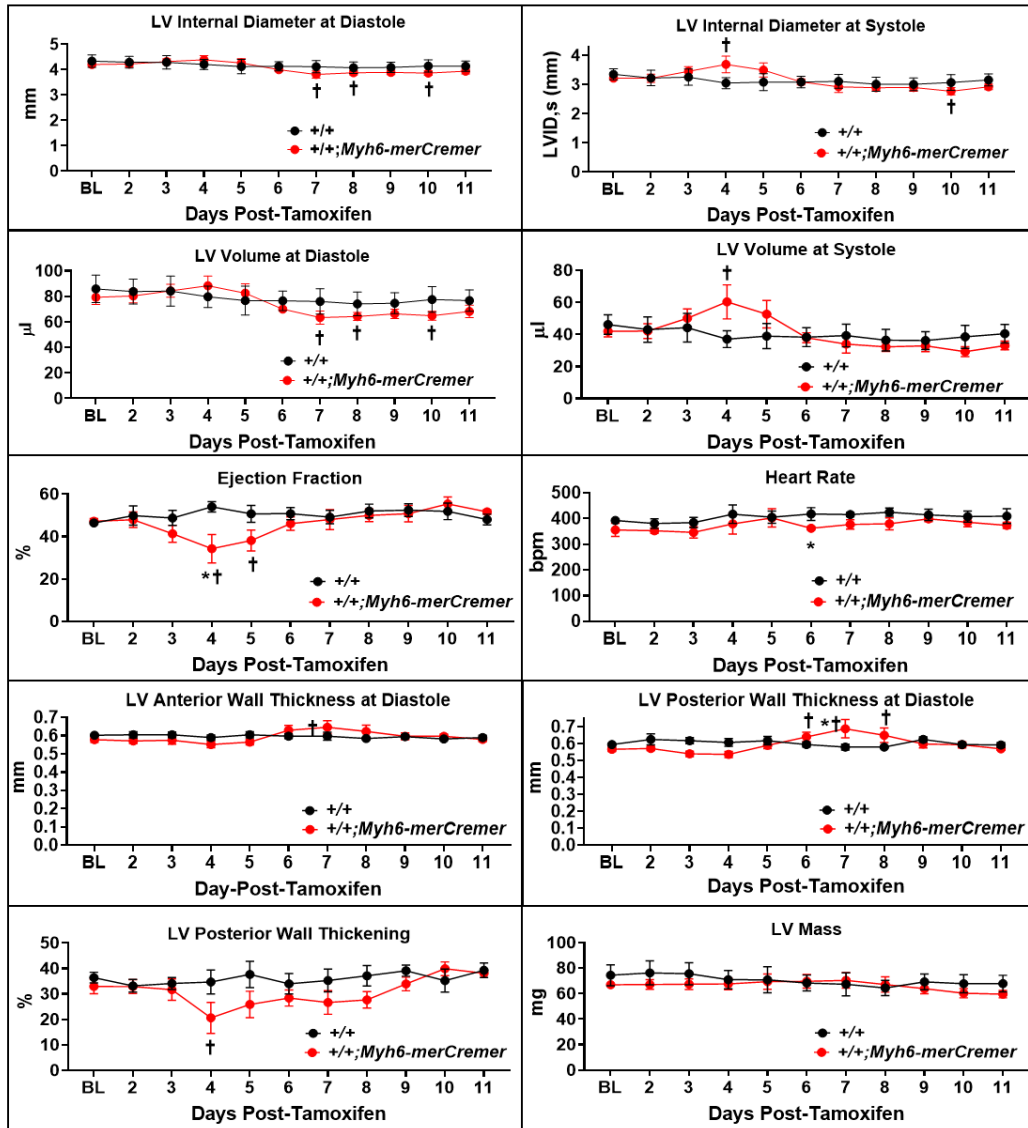

**Figure S1. Echocardiographic assessments showing effects of activated merCremer in the absence of loxP sites.** Adult 10-14 week-old naïve wild-type (+/+) mice (n=4), and mice (n=6) expressing a tamoxifen-induced merCremer-recombinase transgene (+/+;Myh6-merCremer), were injected with tamoxifen (40 mg/kg) on three consecutive days followed by echocardiographic assessment of the left ventricle. \*P < 0.05 vs +/+; †P < 0.05 vs baseline value (day 0).

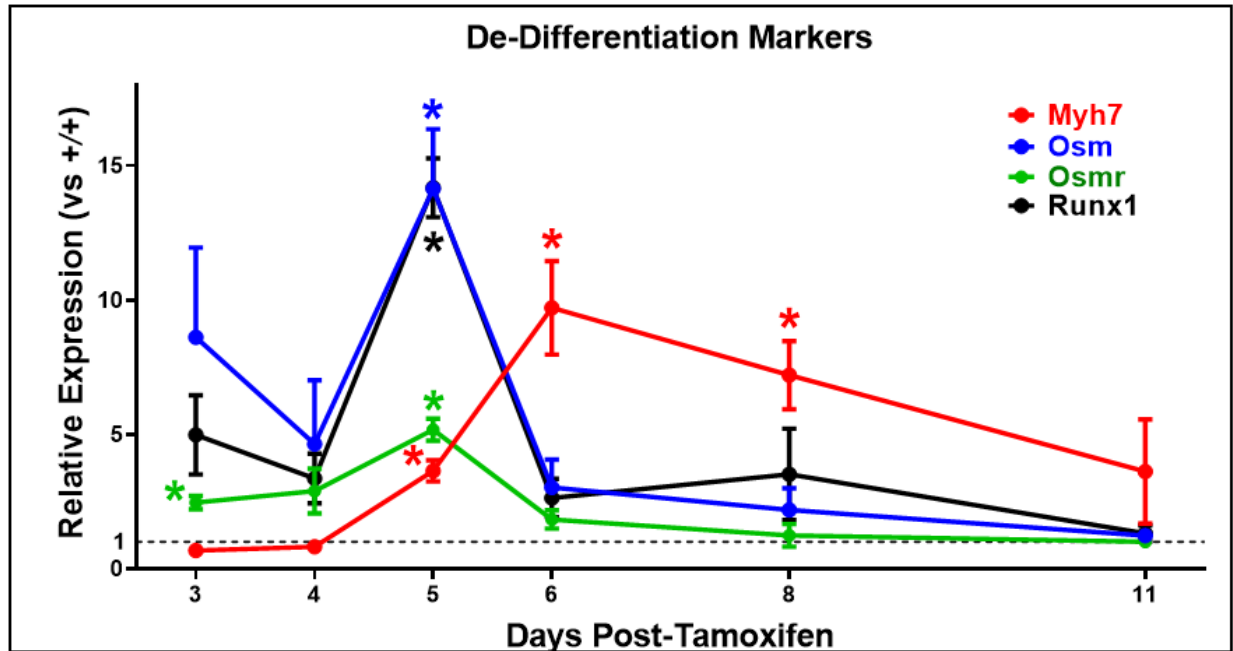

**Figure S2. qPCR determinations show induction of de-differentiation marker genes following tamoxifen-induced activation of merCremer.** Colored lines denote expression of each gene in  $+/+;Myh6-merCremer$  hearts, relative to expression in  $+/+$  wild-type controls at  $Y=1$  (broken line). Expression of each gene was normalized to *Gapdh*.  $N=3$  hearts per timepoint;  $*P < 0.05$  versus  $+/+$ .

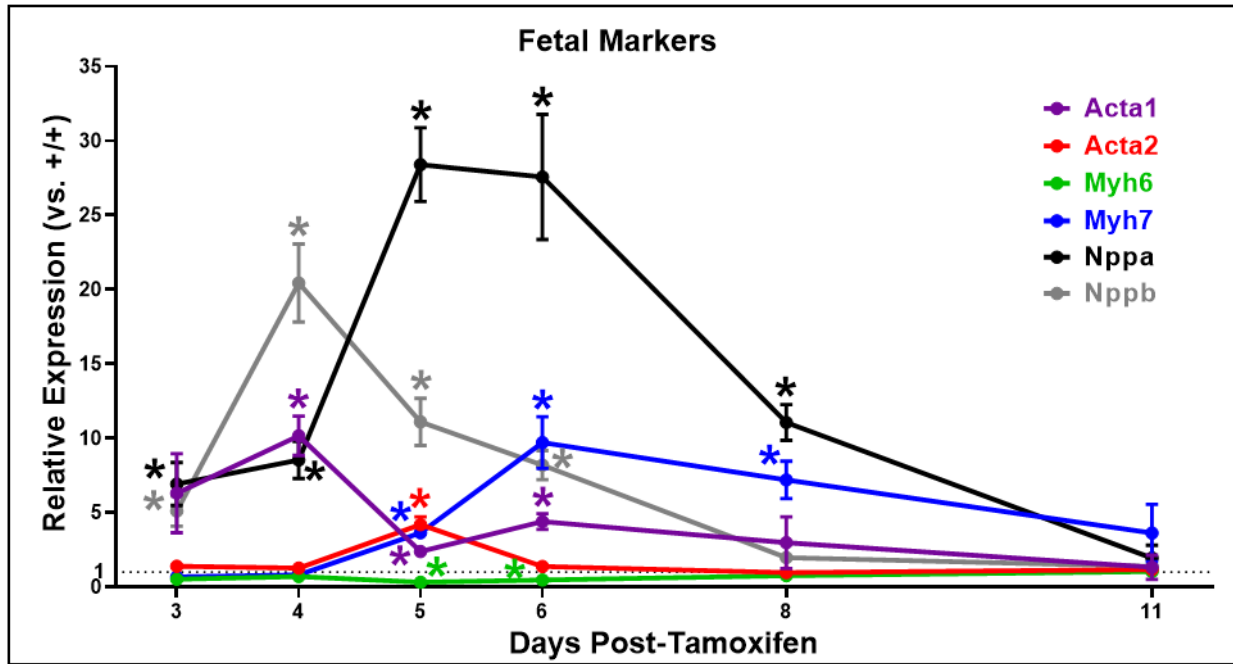

**Figure S3. qPCR determinations show induction of fetal gene markers following tamoxifen-induced activation of merCremer.** Colored lines denote expression of each gene in  $+/+;Myh6\text{-merCremer}$  hearts, relative to expression in  $+/+$  wild-type controls at  $Y=1$  (broken line). Expression of each gene was normalized to *Gapdh*.  $N=3$  hearts per timepoint;  $*P < 0.05$  versus  $+/+$ .

| <b>Table S1. <math>\Delta Cq</math> (relative to Gapdh) of DNA Damage Markers in +/- Wild-type Controls &amp; +/-;Myh6-merCremer Hearts (data are presented as means <math>\pm</math>SEM)</b> |                                           |                  |                  |                  |                  |                  |
|-----------------------------------------------------------------------------------------------------------------------------------------------------------------------------------------------|-------------------------------------------|------------------|------------------|------------------|------------------|------------------|
| <b>+/+</b>                                                                                                                                                                                    |                                           |                  |                  |                  |                  |                  |
| Gene                                                                                                                                                                                          | Days Post-Tamoxifen (N = 3 per timepoint) |                  |                  |                  |                  |                  |
|                                                                                                                                                                                               | 3                                         | 4                | 5                | 6                | 8                | 11               |
| Bax                                                                                                                                                                                           | 7.54 $\pm$ 0.16                           | 7.14 $\pm$ 0.30  | 7.67 $\pm$ 0.07  | 7.16 $\pm$ 0.18  | 7.32 $\pm$ 0.13  | 7.06 $\pm$ 0.14  |
| Brca1                                                                                                                                                                                         | 16.45 $\pm$ 0.11                          | 15.95 $\pm$ 0.38 | 15.69 $\pm$ 0.01 | 15.68 $\pm$ 0.21 | 15.19 $\pm$ 0.25 | 15.40 $\pm$ 0.30 |
| P53                                                                                                                                                                                           | 8.71 $\pm$ 0.10                           | 8.70 $\pm$ 0.37  | 9.50 $\pm$ 0.20  | 8.84 $\pm$ 0.37  | 8.45 $\pm$ 0.21  | 8.36 $\pm$ 0.23  |
| Vcam1                                                                                                                                                                                         | 8.20 $\pm$ 0.28                           | 7.92 $\pm$ 0.29  | 8.49 $\pm$ 0.10  | 7.91 $\pm$ 0.27  | 7.87 $\pm$ 0.08  | 7.61 $\pm$ 0.16  |
| Wee1                                                                                                                                                                                          | 8.89 $\pm$ 0.38                           | 8.33 $\pm$ 0.02  | 8.64 $\pm$ 0.10  | 8.47 $\pm$ 0.06  | 9.00 $\pm$ 0.28  | 8.94 $\pm$ 0.04  |
| <b>+/-;Myh6-merCremer</b>                                                                                                                                                                     |                                           |                  |                  |                  |                  |                  |
| Gene                                                                                                                                                                                          | Days Post-Tamoxifen (N = 3 per timepoint) |                  |                  |                  |                  |                  |
|                                                                                                                                                                                               | 3                                         | 4                | 5                | 6                | 8                | 11               |
| Bax                                                                                                                                                                                           | 6.24 $\pm$ 0.17                           | 6.11 $\pm$ 0.66  | 5.82 $\pm$ 0.16  | 6.65 $\pm$ 0.25  | 7.14 $\pm$ 0.08  | 7.13 $\pm$ 0.20  |
| Brca1                                                                                                                                                                                         | 14.22 $\pm$ 0.44                          | 13.15 $\pm$ 1.44 | 10.82 $\pm$ 0.21 | 13.10 $\pm$ 1.01 | 13.51 $\pm$ 0.70 | 14.91 $\pm$ 0.25 |
| P53                                                                                                                                                                                           | 7.81 $\pm$ 0.24                           | 7.96 $\pm$ 0.86  | 7.22 $\pm$ 0.16  | 8.35 $\pm$ 0.45  | 8.14 $\pm$ 0.21  | 8.57 $\pm$ 0.24  |
| Vcam1                                                                                                                                                                                         | 7.79 $\pm$ 0.29                           | 7.27 $\pm$ 0.68  | 6.39 $\pm$ 0.33  | 7.50 $\pm$ 0.19  | 7.45 $\pm$ 0.27  | 7.53 $\pm$ 0.19  |
| Wee1                                                                                                                                                                                          | 8.61 $\pm$ 0.33                           | 8.42 $\pm$ 0.36  | 7.89 $\pm$ 0.14  | 8.57 $\pm$ 0.15  | 8.95 $\pm$ 0.57  | 8.57 $\pm$ 0.14  |

|                | Baseline   |                               | 3 days-post-MI |                               | 10 days-post-MI |                               | 21 days-post-MI |                               | 28 days-post-MI |                               |
|----------------|------------|-------------------------------|----------------|-------------------------------|-----------------|-------------------------------|-----------------|-------------------------------|-----------------|-------------------------------|
|                | +/+<br>N=5 | +/+;Myh6-<br>merCremer<br>N=5 | +/+<br>N=5     | +/+;Myh6-<br>merCremer<br>N=5 | +/+<br>N=5      | +/+;Myh6-<br>merCremer<br>N=5 | +/+<br>N=5      | +/+;Myh6-<br>merCremer<br>N=5 | +/+<br>N=5      | +/+;Myh6-<br>merCremer<br>N=5 |
| LVAW d (mm)    | 0.62±0.03  | 0.62±0.03                     | 0.79±0.02†     | 0.70±0.07                     | 0.68±0.02       | 0.57±0.03                     | 0.63±0.05       | 0.55±0.02                     | 0.60±0.04       | 0.53±0.03                     |
| LVAW s (mm)    | 0.82±0.03  | 0.85±0.03                     | 0.92±0.03      | 0.78±0.08                     | 0.85±0.03       | 0.64±0.04*†                   | 0.73±0.07       | 0.64±0.04†                    | 0.70±0.05       | 0.61±0.03†                    |
| LVPW d (mm)    | 0.60±0.02  | 0.62±0.03                     | 0.73±0.40      | 0.71±0.07                     | 0.68±0.03       | 0.28±0.05                     | 0.62±0.03       | 0.59±0.04                     | 0.64±0.03       | 0.56±0.06                     |
| LVPW s (mm)    | 0.82±0.03  | 0.85±0.02                     | 0.91±0.02      | 0.82±0.08                     | 0.91±0.01       | 0.66±0.07*†                   | 0.77±0.04       | 0.65±0.06†                    | 0.82±0.04       | 0.68±0.08                     |
| LVID d (mm)    | 3.83±0.14  | 4.22±0.20                     | 3.94±0.19      | 4.64±0.24                     | 4.47±0.11       | 5.54±0.37*†                   | 4.63±0.19       | 5.92±0.39*†                   | 4.76±0.13†      | 6.02±0.37*†                   |
| LVID s (mm)    | 2.89±0.16  | 3.16±0.24                     | 3.16±0.17      | 4.10±0.24                     | 3.51±0.06       | 5.09±0.42*†                   | 3.86±0.22       | 5.45±0.43*†                   | 4.05±0.15†      | 5.58±0.39*†                   |
| FS (%)         | 24.7±1.8   | 25.4±2.3                      | 19.5±2.8       | 11.6±1.9*†                    | 21.4±1.5        | 8.4±1.6*†                     | 16.8±2.4†       | 8.4±1.5*†                     | 14.9±2.2†       | 7.6±1.3†                      |
| LV vol; d (μl) | 61.5±4.3   | 77.9±9.0                      | 68.6±3.6       | 91.6±8.7                      | 83.0±6.7        | 137.2±13.0*†                  | 89.7±11.3       | 167.5±19.2*†                  | 99.3±8.9        | 165.8±19.2*†                  |
| LV vol; s (μl) | 37.0±2.7   | 46.5±5.4                      | 49.6±2.1       | 66.4±6.5                      | 60.7±4.5        | 117.3±13.1*†                  | 65.2±8.2        | 145.8±19.4*†                  | 74.3±6.7†       | 144.2±17.7*†                  |
| EF (%)         | 39.9±0.3   | 40.4±0.2                      | 27.6±0.9†      | 27.6±0.5†                     | 26.6±0.7†       | 15.3±2.2*†                    | 27.2±0.5†       | 14.1±2.6*†                    | 25.1±1.0†       | 13.2±2.0*†                    |
| MPI            | 0.33±0.02  | 0.34±0.01                     | 0.45±0.02†     | 0.46±0.01†                    | 0.36±0.03       | 0.49±0.02*†                   | 0.43±0.04†      | 0.48±0.02†                    | 0.47±0.03†      | 0.47±0.02†                    |
| HR (bpm)       | 370±10     | 374±11                        | 439±4†         | 418±13                        | 385±28          | 429±2                         | 364±22          | 425±30                        | 374±14          | 416±20                        |

**Table S2: Echocardiographic assessment of infarcted +/+ and +/+;Myh6-merCremer mice. \*P<0.05 vs. +/+ and †P<0.05 vs. baseline (Day 0).**

| <b>Table S3. Primers &amp; Taqman Probe Kits</b>                                                  |                                |               |
|---------------------------------------------------------------------------------------------------|--------------------------------|---------------|
| <b>for PCR Genotyping</b>                                                                         |                                |               |
| Transgene                                                                                         | Sequence                       | Amplicon (bp) |
| <i>Myh6-merCremer</i>                                                                             | FWD 5'-ATACCGGAGATCATGCAAGC-3' | 440 bp        |
|                                                                                                   | REV 5'-AGGTGGACCTGATCATGGAG-3' |               |
| Cycling Details: 94°C 5 min, then 35 cycles of 94°C 30sec/61°C 45sec/72°C 45sec, then 72°C 10 min |                                |               |
| <b>for Taqman qRT-PCR</b>                                                                         |                                |               |
| Gene Target                                                                                       | Thermo-Fisher catalog #        |               |
| <b>Normalizers</b>                                                                                |                                |               |
| Gapdh                                                                                             | Mm99999915_g1                  |               |
| <b>Cell-Cycle Activation Markers</b>                                                              |                                |               |
| Ccna2 (Cyclin A2)                                                                                 | Mm00438063_m1                  |               |
| Ccnb1 (Cyclin B1)                                                                                 | Mm03053893_gH                  |               |
| Cdk1                                                                                              | Mm00772472_m1                  |               |
| Ccnd1 (Cyclin D1)                                                                                 | Mm00432359_m1                  |               |
| Ccnd2 (Cyclin D2)                                                                                 | Mm00438070_m1                  |               |
| Cdk4                                                                                              | Mm00726334_s1                  |               |
| <b>Cell-Cycle Inhibitors</b>                                                                      |                                |               |
| Cdkn1a (p21)                                                                                      | Mm00432448_m1                  |               |
| Cdkn1b (p27)                                                                                      | Mm00438168_m1                  |               |
| <b>DDR Markers</b>                                                                                |                                |               |
| Bax                                                                                               | Mm00432051_m1                  |               |
| Brca1                                                                                             | Mm00515386_m1                  |               |
| Trp53 (p53)                                                                                       | Mm01731290_g1                  |               |
| Vcam1                                                                                             | Mm01320970_m1                  |               |
| Wee1                                                                                              | Mm00494175_m1                  |               |
| <b>De-Differentiation Markers</b>                                                                 |                                |               |
| Myh7                                                                                              | Mm00600555_m1                  |               |
| Osm                                                                                               | Mm01193966_m1                  |               |
| Osmr                                                                                              | Mm01307326_m1                  |               |
| Runx1                                                                                             | Mm01213404_m1                  |               |

| <b>Table S4. Antibodies for Immunofluorescent Staining</b> |              |            |         |          |  |
|------------------------------------------------------------|--------------|------------|---------|----------|--|
| Antigen                                                    | Manufacturer | Catalog #  | Made in | Dilution |  |
| 1° 5'-bromodeoxyuridine (BrdU)                             | Abcam        | ab6326     | rat     | 1:200    |  |
| 2° goat anti-rat 594                                       | Invitrogen   | A-11007    | goat    | 1:500    |  |
|                                                            |              |            |         |          |  |
| 1° phosphohistone H3 (pH3)                                 | Millipore    | 06-570     | rabbit  | 1:400    |  |
| 2° goat anti-rabbit 594                                    | Invitrogen   | A-11037    | goat    | 1:500    |  |
|                                                            |              |            |         |          |  |
| 1° Ki67                                                    | Invitrogen   | 14-5698-82 | rat     | 1:250    |  |
| 2° goat anti-rat 594                                       | Invitrogen   | A-11007    | goat    | 1:500    |  |
|                                                            |              |            |         |          |  |
| 1° Cre-recombinase                                         | Millipore    | 69050-3    | rabbit  | 1:500    |  |
| 2° goat anti-rabbit 594                                    | Invitrogen   | A-11037    | goat    | 1:500    |  |
|                                                            |              |            |         |          |  |
| 1° cardiac-Troponin (cTnT)                                 | Abcam        | ab8295     | mouse   | 1:200    |  |
| 2° goat anti-mouse 488                                     | Invitrogen   | A-11029    | goat    | 1:500    |  |
